# Supplementary material for: Oncogenic RAS Generates Cancer Stem Cells in p53-Deficient Fibroblasts Through SOX2 Induced By CDK1-Mediated Protein O-GlcNAcylation
Source: Research Square preprint supplement (doi:10.21203/rs.3.rs-981157/v1), 2021-11-03

## **Supplementary Information**

### **Title**

Oncogenic RAS generates cancer stem cells in p53-deficient fibroblasts through SOX2 induced by CDK1-mediated protein O-GlcNAcylation

### **Authors**

Masahiro Shimizu, Hiroshi Shibuya, and Nobuyuki Tanaka

### **Supplementary Figures 1-5**

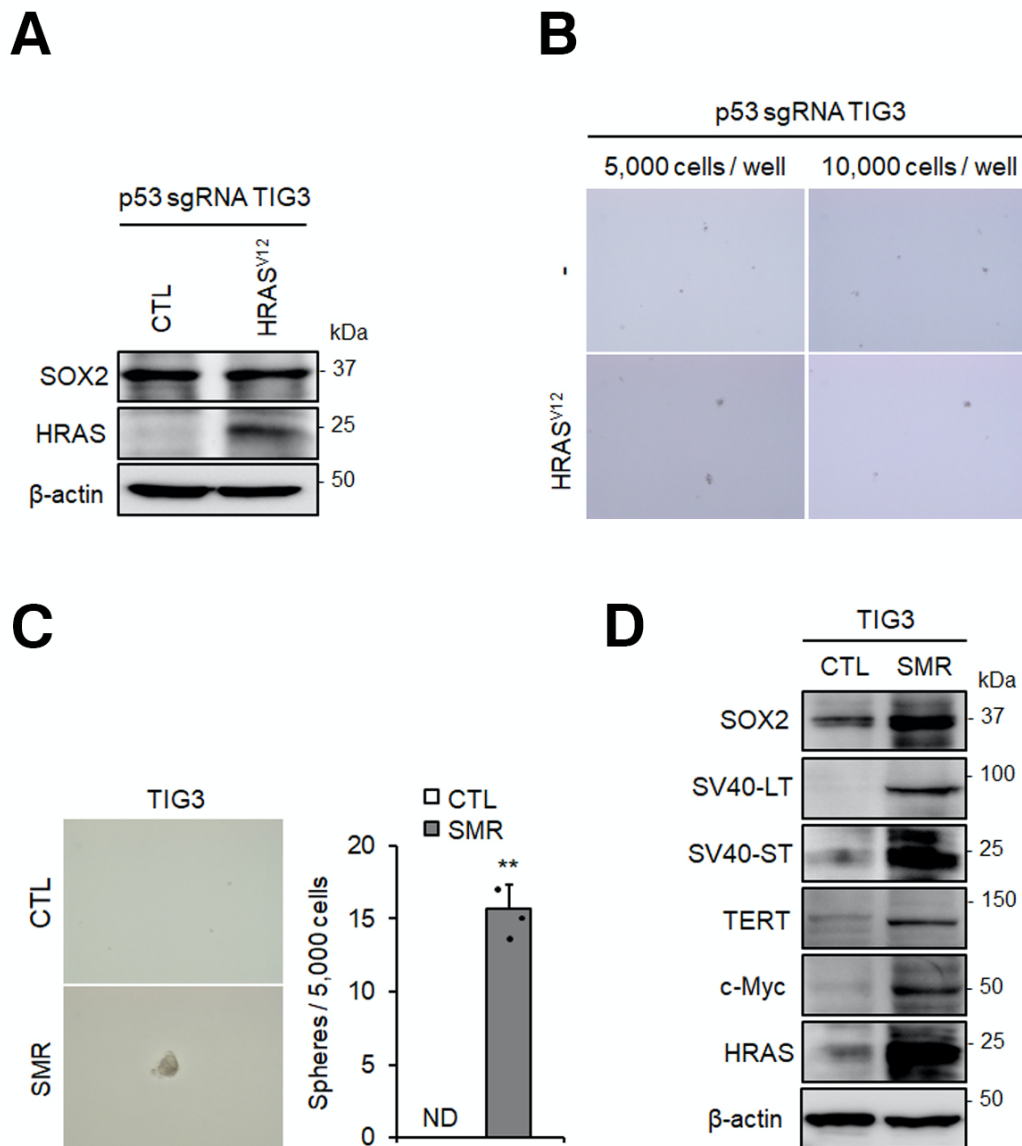

**Supplementary Figure 1.** Oncogenic mutations causing transformation are required for SOX2 expression and sphere formation in TIG-3 cells. **A**, p53-deficient human TIG-3 cells were generated by co-expressing p53 sgRNA with CRISPR and Cas9 protein using lentiviral infection for 2 days and selection with puromycin for 3 days. The HRAS<sup>V12</sup> mutant protein was stably expressed in these cells by retroviral infection for 2 days and selection with hygromycin for 3 days. Expression of HRAS and SOX2 was confirmed by immunoblot analysis of the HRAS<sup>V12</sup>-expressing p53 knockout TIG-3 cells. **B**, Sphere formation in HRAS<sup>V12</sup>-expressing p53 knockout TIG-3 cells. Representative images of spheres from 5,000 and 10,000 cells are shown. **C**, SV-40, c-Myc, and HRAS<sup>V12</sup> were stably expressed in TIG-3 (TIG-3–SMR) cells by retroviral infection for 2 days, and the cells were selected with blasticidin, neomycin, and hygromycin for 3 days.

Representative images of sphere formation in TIG-3–SMR cells are shown on the left; the graph on the right shows quantification of the numbers of spheres counted per 5,000 cells. Significance was confirmed by comparisons between the number of spheres in TIG-3 (CTL) and TIG-3–SMR cells. ND, none detected.  $**P < 0.01$ . **D**, Western blot analysis of the indicated proteins in TIG-3–SMR cells. Uncropped blot images are presented in Supplementary Fig. S5.

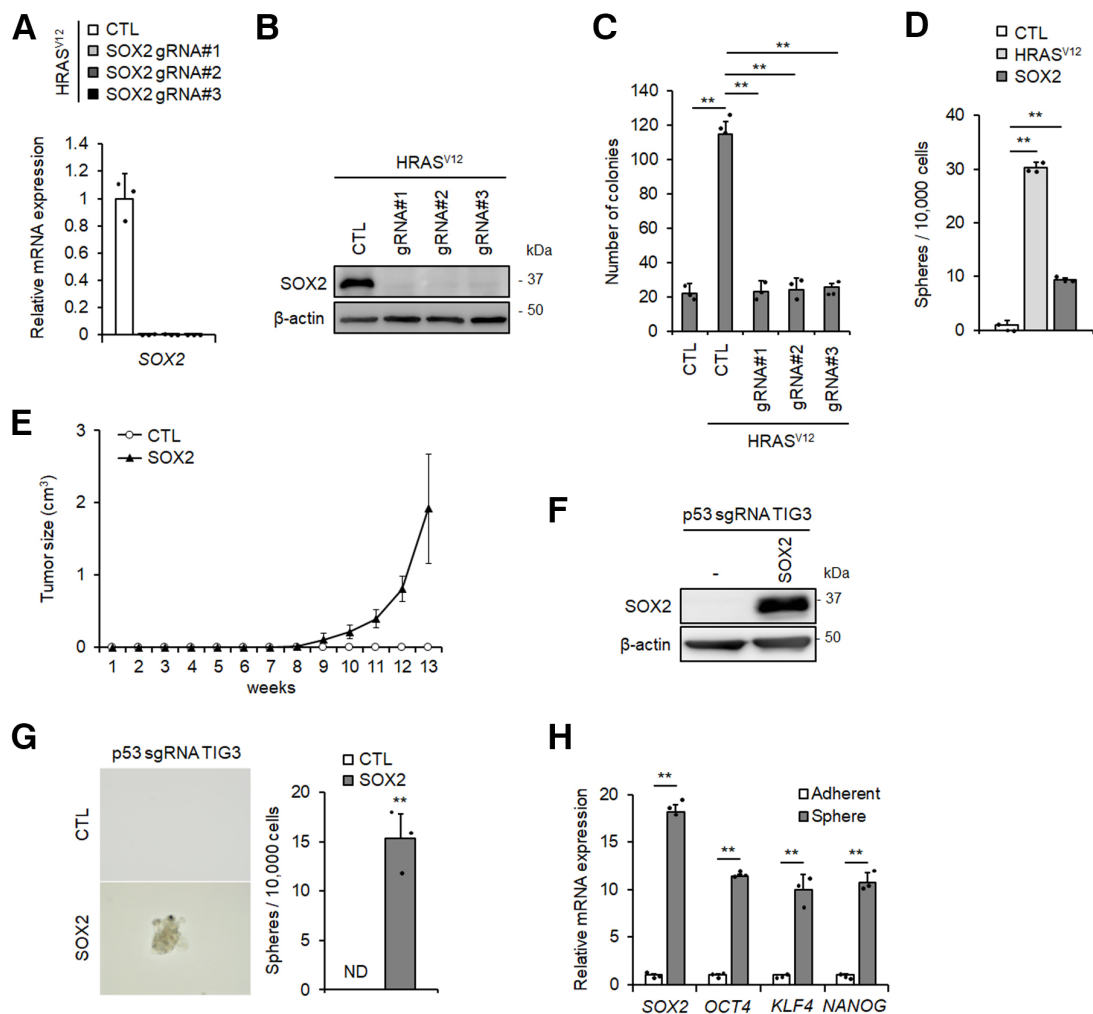

**Supplementary Figure 2.** SOX2 expression is required for colony, sphere, and tumour formation. **A** and **B**, SOX2 sgRNAs were co-expressed with CRISPR and Cas9 proteins in  $HRAS^{V12}$ -expressing  $p53^{-/-}$  mouse embryonic fibroblasts (MEFs). Expression of SOX2 was confirmed by qPCR analysis (**A**) and immunoblotting (**B**). **C**, Colony formation assay of  $HRAS^{V12}$ -expressing  $p53^{-/-}$  MEFs containing each SOX2 sgRNA.  $**P < 0.01$ . **D**, SOX2 was stably expressed in  $p53^{-/-}$  MEFs by retroviral infection for 2 days, and cells were selected with puromycin for 3 days. The numbers of spheres formed from  $HRAS^{V12}$ - or SOX2-expressing  $p53^{-/-}$  MEFs were counted after 7 days of culture. Significance was confirmed by comparison with the number of spheres from  $p53^{-/-}$  MEFs expressing only the vector (CTL).  $**P < 0.01$ . **E**,  $p53^{-/-}$  MEFs (CTL) or SOX2-expressing  $p53^{-/-}$  MEFs ( $1 \times 10^6$ ) were subcutaneously injected into immunodeficient mice ( $n = 5$  per group). Tumour sizes were measured each week. **F**, SOX2 was stably expressed in p53 knockout TIG-3 cells. SOX2 expression was confirmed by immunoblotting. **G**, Sphere formation of cells indicated in (**F**) after 7 days of culture. Representative images are shown on the left, and quantification

is shown on the right. ND, none detected.  $**P < 0.01$ . **H**, qPCR analysis of the stem cell marker genes *SOX2*, *OCT4*, *KLF4*, and *NANOG* in adherent and sphere-forming cells indicated in (G).  $**P < 0.01$ . A, C, D, G and H: Data are presented as the means  $\pm$  SD of three independent experiments. Statistical analysis was performed with Student's t-tests. Uncropped blot images are presented in Supplementary Fig. S5.

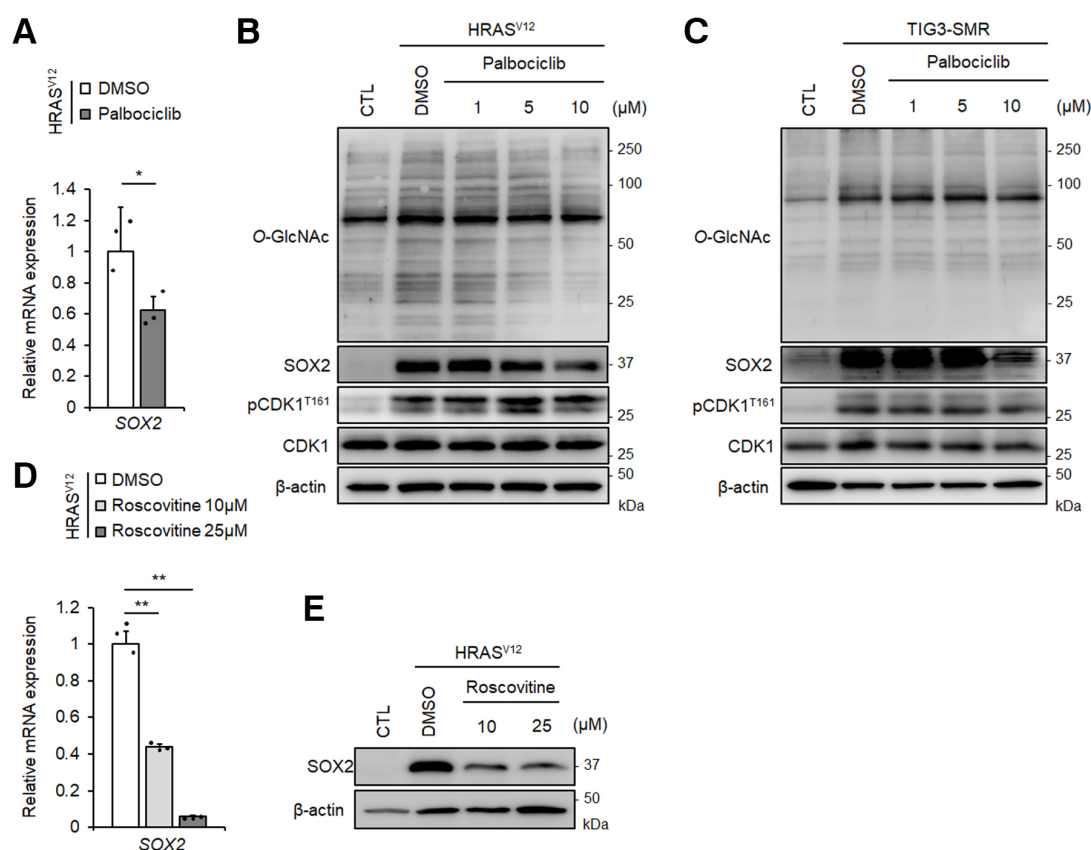

**Supplementary Figure 3. CDK inhibitors suppress SOX2 expression.** **A**, Expression levels of *SOX2* mRNA in *HRAS*<sup>V12</sup>-expressing *p53*<sup>-/-</sup> mouse embryonic fibroblasts (MEFs) treated with palbociclib (10 μM) for 24 h. \**P* < 0.05. **B** and **C**, Immunoblotting analysis of *O*-GlcNAc-modified proteins, SOX2 expression, and active pCDK1 in *HRAS*<sup>V12</sup>-expressing *p53*<sup>-/-</sup> MEFs (**B**) and human TIG-3-SMR cells (**C**) treated with vehicle (DMSO) or palbociclib (1, 5, 10 μM) for 24 h. **D** and **E**, qPCR analysis (**D**) and immunoblotting (**E**) of SOX2 in *HRAS*<sup>V12</sup>-expressing *p53*<sup>-/-</sup> MEFs treated with the CDK inhibitor roscovitine (10, 25 μM) for 24 h. \*\**P* < 0.01. **A** and **D**: Data are presented as the means ± SD of three independent experiments. Statistical analysis was performed with Student's *t*-tests. Uncropped blot images are presented in Supplementary Fig. S5.

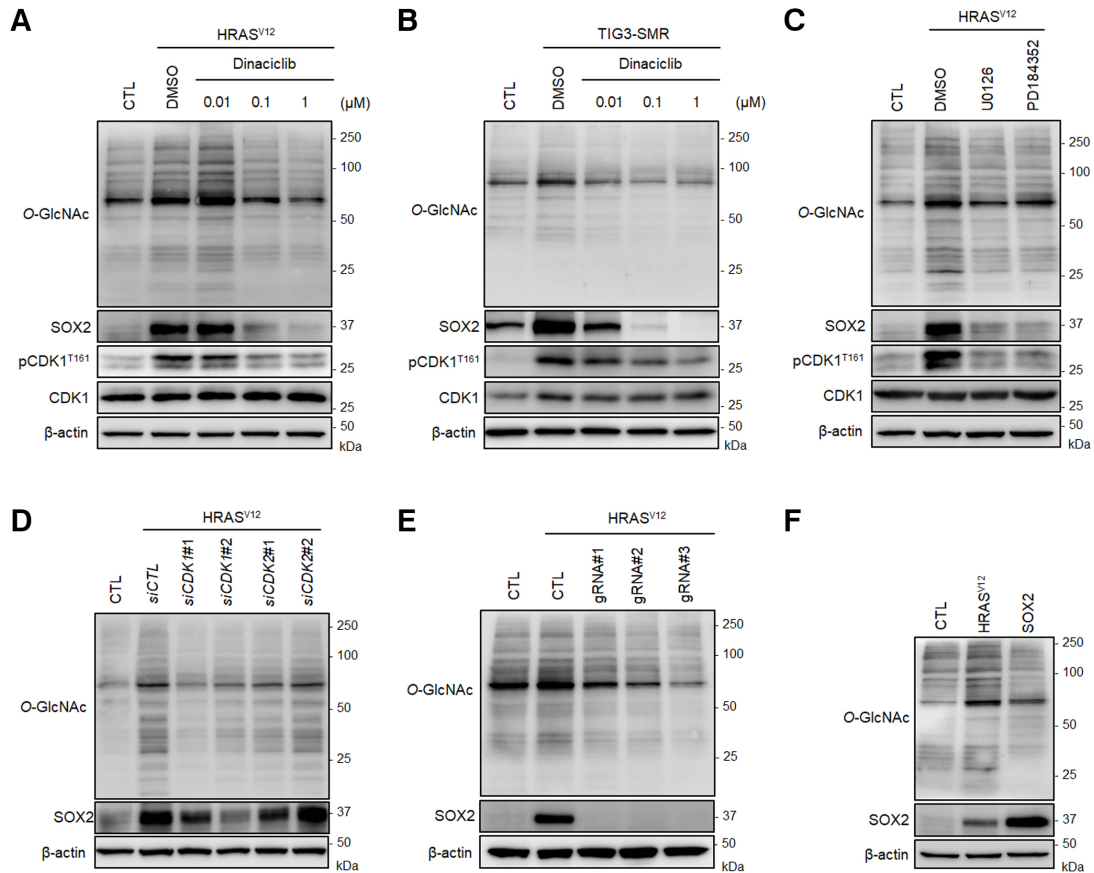

**Supplementary Figure 4.** *O*-GlcNAc levels correlate with SOX2 expression. **A** and **B**, Western blot analysis of *O*-GlcNAc-modified proteins, SOX2 expression, and active pCDK1 in *HRAS*<sup>V12</sup>-expressing *p53*<sup>-/-</sup> mouse embryonic fibroblasts (MEFs) (**A**) and human TIG-3-SMR cells (**B**) treated with vehicle (DMSO) or dinaciliclib (0.01, 0.1, 1 μM) for 24 h. **C**, Immunoblotting of *O*-GlcNAc-modified proteins, SOX2, and pCDK1 in *HRAS*<sup>V12</sup>-expressing *p53*<sup>-/-</sup> MEFs treated with vehicle, U0126 (10 μM), or PD184352 (1 μM) for 24 h. **D**, Expression levels of *O*-GlcNAc-modified proteins and SOX2 in *HRAS*<sup>V12</sup>-expressing *p53*<sup>-/-</sup> MEFs following knockdown of CDK1 or CDK2 by siRNAs. **E**, Immunoblotting assay of *O*-GlcNAcylation levels in *HRAS*<sup>V12</sup>-expressing *p53*<sup>-/-</sup> MEFs containing each *SOX2* sgRNA. **F**, Expression levels of *O*-GlcNAc-modified proteins in *HRAS*<sup>V12</sup>-expressing *p53*<sup>-/-</sup> MEFs and *SOX2*-expressing *p53*<sup>-/-</sup> MEFs. Uncropped blot images are presented in Supplementary Fig. S5.

**Supplementary Figure 5.** The original images in all Figures and Supplementary Figures.

Figure 1

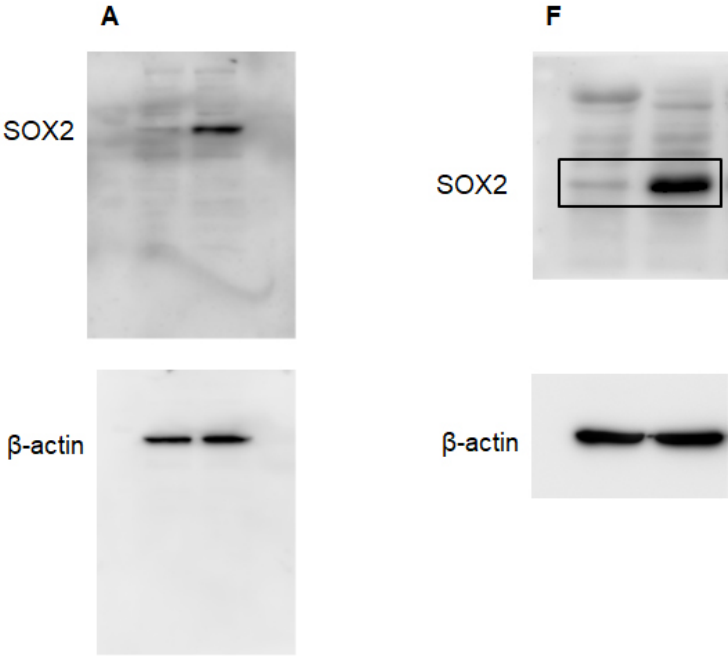



Supplementary Figure 5 continued

Figure 3

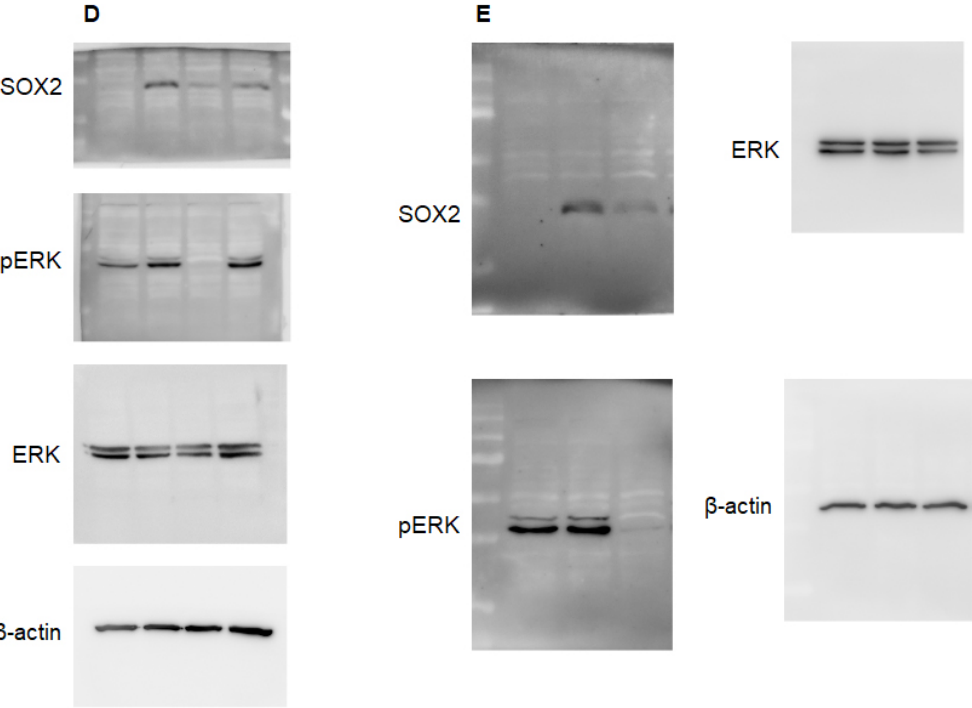

Supplementary Figure 5 continued

Figure 4

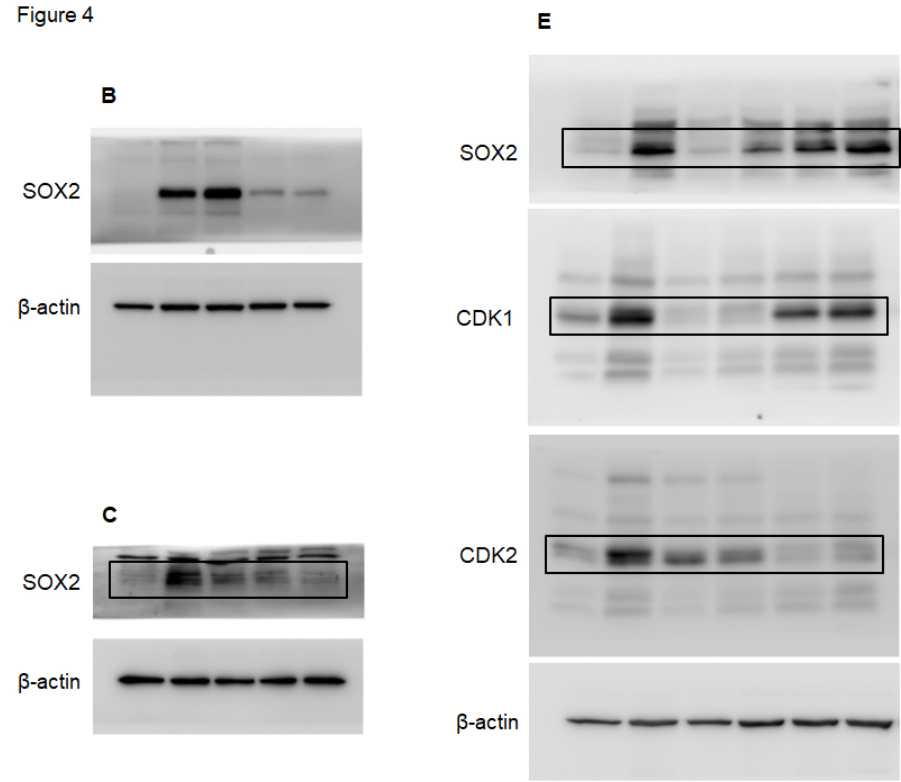

Figure 5

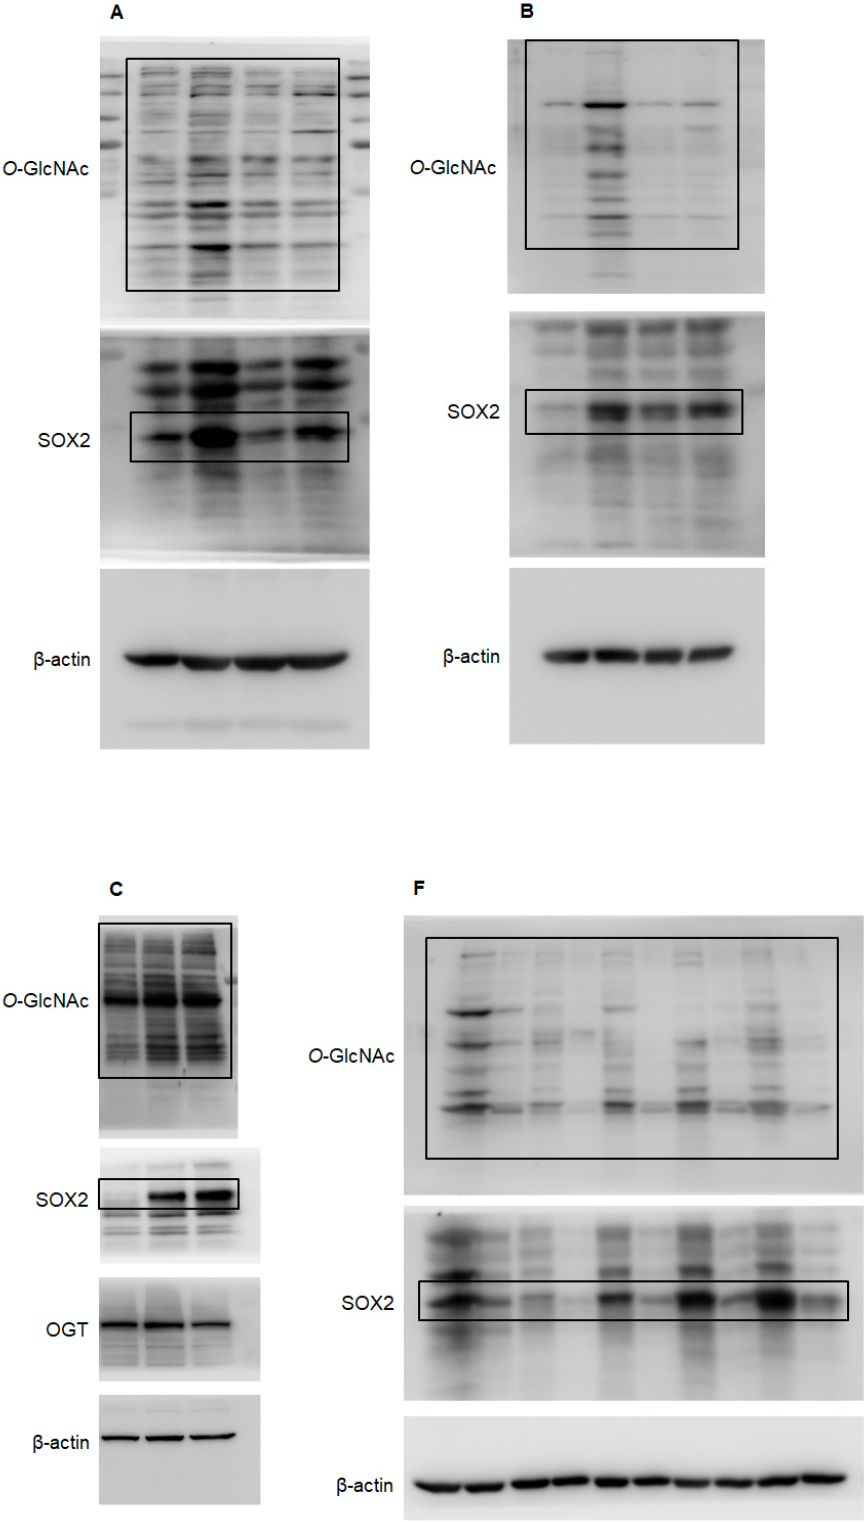

Supplementary Figure 5 continued

Supplementary Figure 1

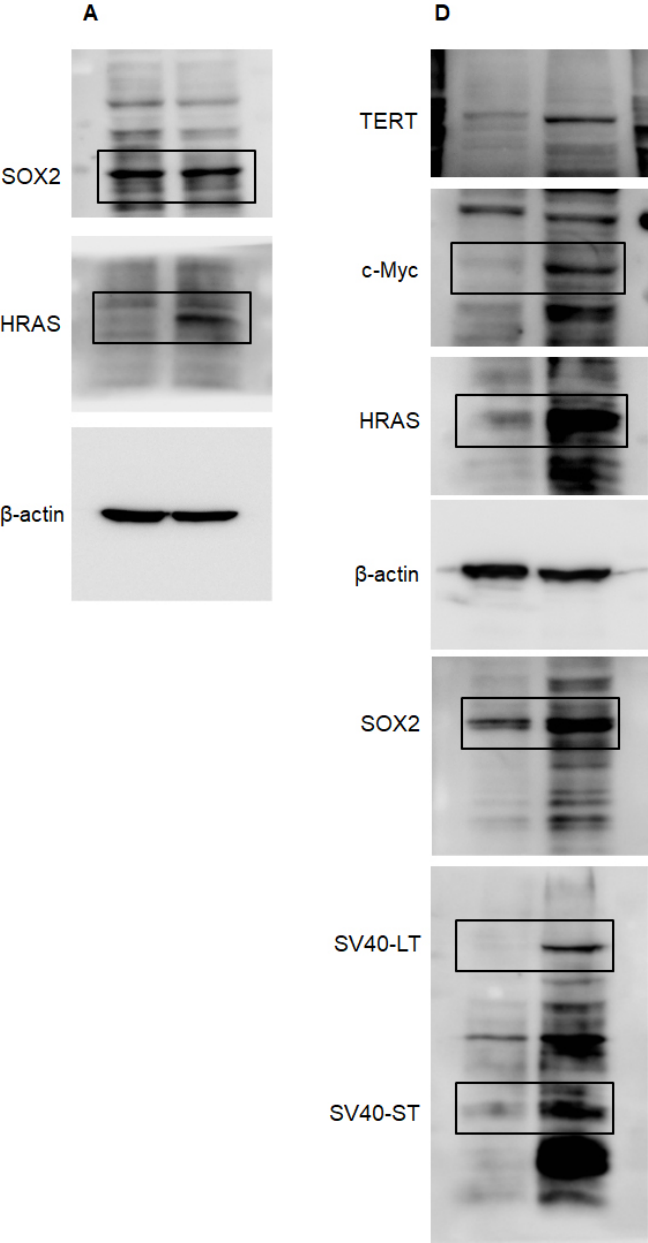

**Supplementary Figure 5 continued**

Supplementary Figure 2

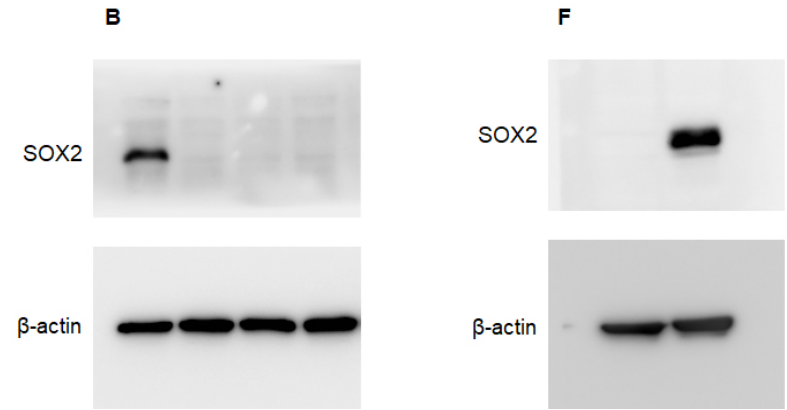

**Supplementary Figure 5 continued**

Supplementary Figure 3

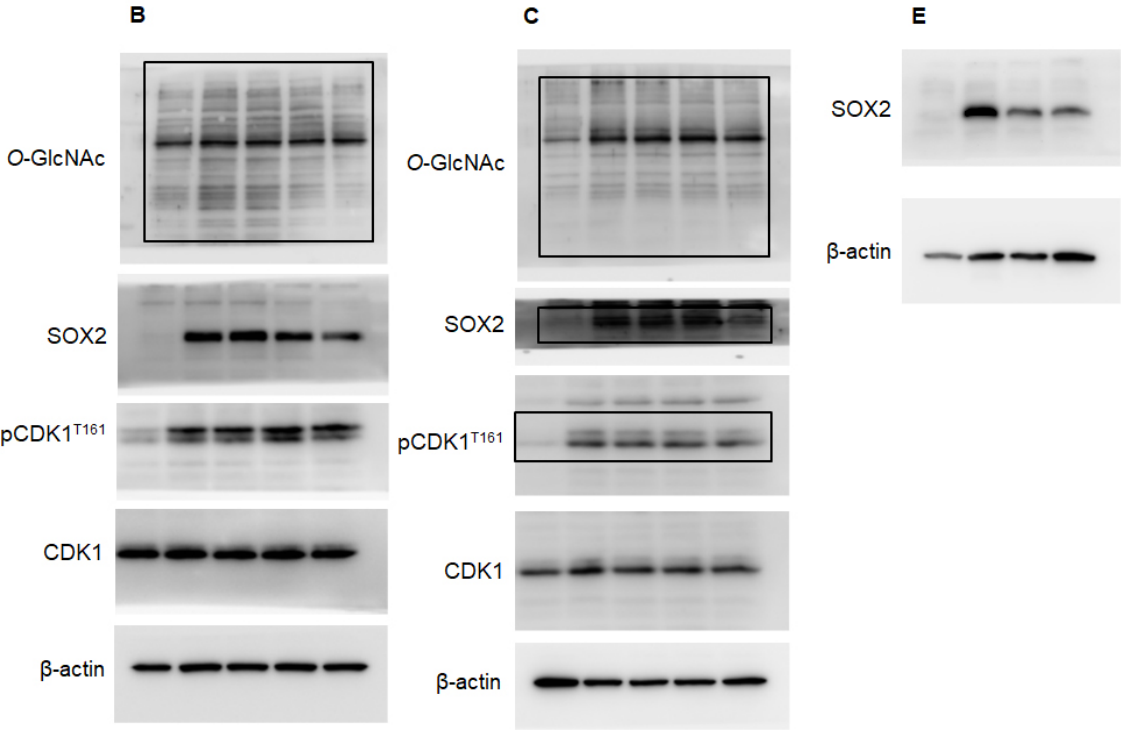

Supplementary Figure 5 continued

Supplementary Figure 4

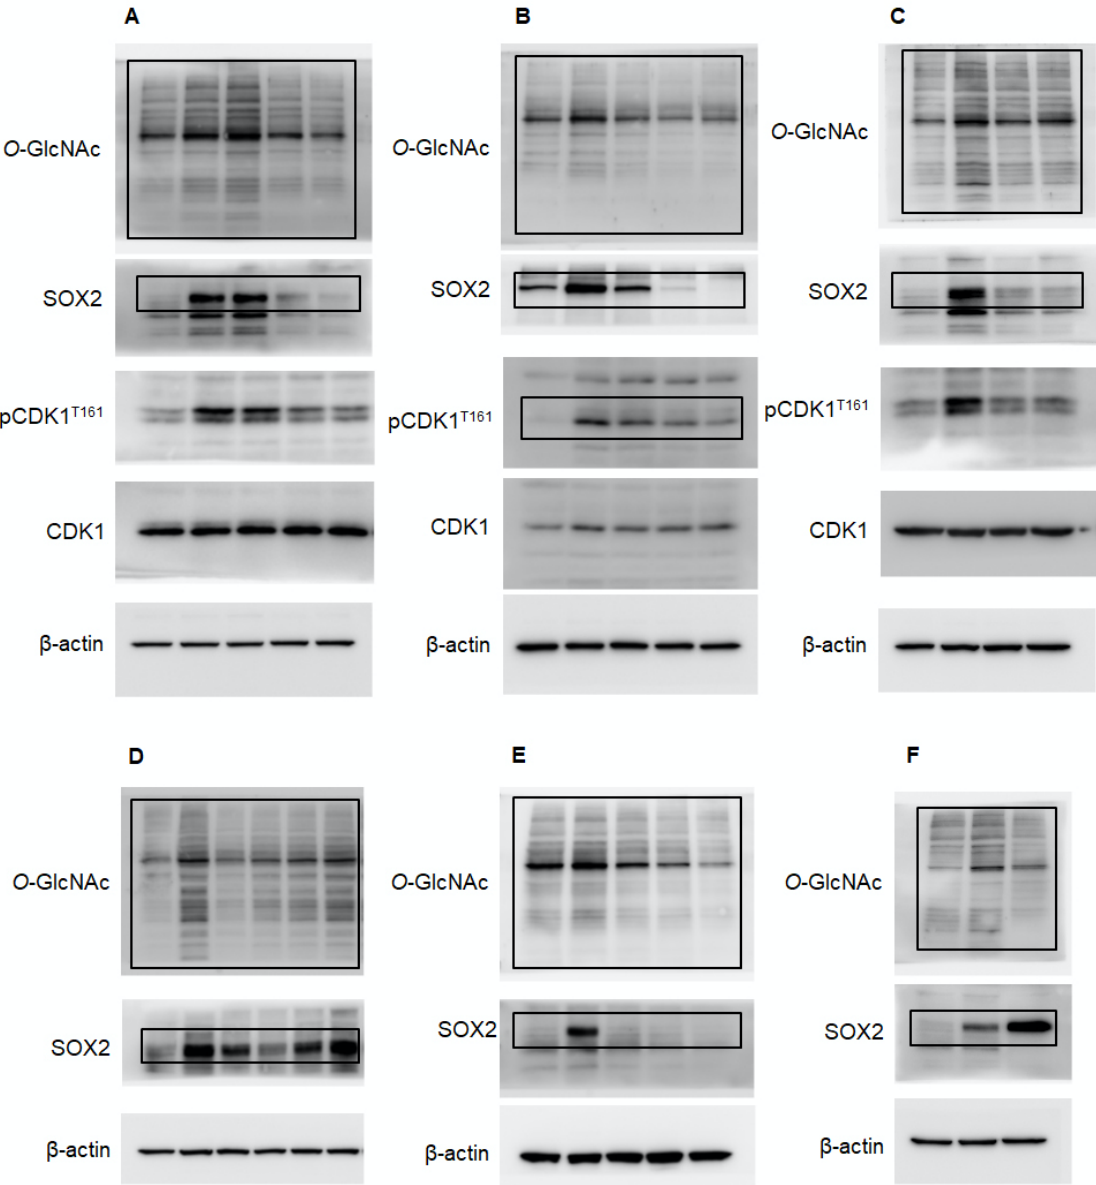

Supplement: Supplementary file 1 [file 7a85a1a97213a802dd1c7125.pdf]
